# Supplementary material for: Comparative Population Pharmacokinetics of Darunavir in SARS-CoV-2 Patients vs. HIV Patients: The Role of Interleukin-6
Source: Springer Nature journal article supplement (doi:10.1007/s40262-020-00933-8), 2020-08-27
Supplement: MOESM1 [file 18321228]

# **Comparative population pharmacokinetics of darunavir in SARS-CoV2 patients vs. HIV patients: the role of interleukin-6**

Pier Giorgio Cojutti<sup>1,2</sup>, Angela Londero<sup>3</sup>, Paola Della Siega<sup>3</sup>, Filippo Givone<sup>3</sup>, Martina Fabris<sup>4</sup>, Jessica Biasizzo<sup>4</sup>, Carlo Tascini<sup>3</sup>, Federico Pea<sup>1,2\*</sup>

<sup>1</sup> Department of Medicine, University of Udine, Italy.

<sup>2</sup> Institute of Clinical Pharmacology, Santa Maria della Misericordia University Hospital of Udine, ASUFC, Udine, Italy.

<sup>3</sup> Clinic of Infectious Diseases, Santa Maria della Misericordia University Hospital of Udine, ASUFC, Udine, Italy.

<sup>4</sup>Institute of Clinical Pathology, Santa Maria della Misericordia University Hospital of Udine, ASUFC, Udine, Italy.

**Short running title:** PopPk of darunavir in SARS-Cov2

**Keywords:** Population pharmacokinetics, antiretrovirals, inflammation

**Word count of the text: 3255**

**Word count of the abstract: 249**

\*Corresponding author. Prof. Federico Pea, Department of Medicine, University of Udine and Institute of Clinical Pharmacology, Santa Maria della Misericordia University Hospital of Udine, ASUFC, P.le S. Maria della Misericordia 3, 33100 Udine, Italy. Tel: +39-0432- 559833; email: federico.pea@uniud.it

**Table S1.** Clinical data of the SARS-CoV2 infected patients (n=30)

| ID | Age | Gender | Drug     | Stage of severity* | Co-morbidities                                   | Co-treatments                                                                                                                     | ADRs                           |
|----|-----|--------|----------|--------------------|--------------------------------------------------|-----------------------------------------------------------------------------------------------------------------------------------|--------------------------------|
| 1  | 57  | M      | DRV/COBI | III                | None                                             | Hydroxychloroquine, azithromycin, ceftriaxone                                                                                     | Cutaneous rash, thrombocytosis |
| 2  | 44  | M      | DRV/COBI | IIa                | None                                             | Hydroxychloroquine, ceftriaxone                                                                                                   | None                           |
| 3  | 64  | M      | DRV/COBI | III                | COPD, acquired hemophilia                        | Hydroxychloroquine, pantoprazole, prednisone, cyclophosphamide                                                                    | None                           |
| 4  | 33  | F      | DRV/COBI | IIb                | Obesity                                          | Hydroxychloroquine, azithromycin, enoxaparin                                                                                      | None                           |
| 5  | 78  | M      | DRV/COBI | III                | Hypertension                                     | Hydroxychloroquine, enoxaparin, amiodarone, ceftobiprole                                                                          | None                           |
| 6  | 68  | F      | DRV/COBI | IIb                | Dyslipidemia, hypertension, hypothyroidism, GERD | Hydroxychloroquine, enoxaparin                                                                                                    | None                           |
| 7  | 77  | M      | DRV/COBI | IIa                | Parkinson disease, bladder cancer                | Hydroxychloroquine, enoxaparin, bisoprolol, furosemide, aldactone, dexamethasone, ceftobiprole, L-dopa, selegiline,               | None                           |
| 8  | 63  | M      | DRV/COBI | III                | Factor V Leiden thrombophilia                    | Hydroxychloroquine, azithromycin, enoxaparin, pantoprazole, furosemide, propofol, remifentanyl                                    | None                           |
| 9  | 62  | F      | DRV/COBI | IIa                | None                                             | Hydroxychloroquine, azithromycin, ceftriaxone                                                                                     | None                           |
| 10 | 82  | F      | DRV/COBI | IIb                | None                                             | Hydroxychloroquine, azithromycin, alprazolam,                                                                                     | None                           |
| 11 | 49  | M      | DRV/COBI | III                | HBV-related chronic hepatitis                    | Hydroxychloroquine, azithromycin, enoxaparin, ceftriaxone, entecavir                                                              | None                           |
| 12 | 67  | M      | DRV/COBI | I                  | Type-II diabetes, atrial fibrillation, obesity   | Hydroxychloroquine, azithromycin, metoprolol, metformin, furosemide, allopurinol, liraglutide                                     | Tonic-clonic seizures          |
| 13 | 52  | M      | DRV/COBI | III                | Depression, psychosis                            | Pantoprazole, remifentanyl, furosemide, levetiracetam, olanzapine, escitalopram, metoclopramide, daptomycin                       | QT-prolongation                |
| 14 | 60  | M      | DRV/COBI | III                | Hypertension, obesity                            | Hydroxychloroquine, azithromycin, enoxaparin, pantoprazole, furosemide, propofol, remifentanyl, metoclopramide, cisatracurium     | None                           |
| 15 | 56  | F      | DRV/COBI | IIb                | Hypothyroidism, autoimmune gastritis             | Hydroxychloroquine, enoxaparin, L-thyroxine                                                                                       | None                           |
| 16 | 69  | F      | DRV/COBI | III                | Dyslipidemia, hypertension                       | Hydroxychloroquine, azithromycin, enoxaparin, pantoprazole, furosemide, propofol, remifentanyl, cisatracurium, methylprednisolone | None                           |
| 17 | 65  | M      | DRV/COBI | I                  | Deep vein thrombosis                             | Enoxaparin                                                                                                                        | None                           |
| 18 | 55  | F      | DRV/COBI | IIa                | IBD, bronchiectasis                              | Enoxaparin                                                                                                                        | None                           |
| 19 | 63  | F      | DRV/COBI | IIa                | None                                             | Hydroxychloroquine, enoxaparin                                                                                                    | None                           |
| 20 | 72  | M      | DRV/COBI | IIa                | Prostatic cancer, hypertension                   | Hydroxychloroquine, enoxaparin, azithromycin, telmisartan                                                                         | None                           |
| 21 | 75  | M      | DRV/COBI | III                | Type-II diabetes, obesity, epilepsy              | Hydroxychloroquine, azithromycin, aspirin, zonisamide                                                                             | None                           |
| 22 | 54  | F      | DRV/COBI | IIa                | Dyslipidemia, hypertension, obesity              | Hydroxychloroquine, enoxaparin, paracodine, olmesartan                                                                            | Diarrhea                       |
| 23 | 76  | M      | DRV/RTV  | IIb                | Dyslipidemia, hypertension, depression           | Hydroxychloroquine, pantoprazole, doxazosin, bisoprolol, sertraline, allopurinol, quetiapine, sertraline                          | Asthenia                       |
| 24 | 55  | M      | DRV/RTV  | IIb                | Cerebrovascular disease                          | Hydroxychloroquine, enoxaparin, aspirin                                                                                           | Diarrhea                       |
| 25 | 71  | M      | DRV/RTV  | IIb                | hypertension                                     | Hydroxychloroquine                                                                                                                | None                           |
| 26 | 83  | F      | DRV/RTV  | IIb                | Lung cancer                                      | Hydroxychloroquine, zolpidem, pregabalin                                                                                          | None                           |
| 27 | 49  | F      | DRV/RTV  | IIb                | Hypertension                                     | Hydroxychloroquine, azithromycin, enoxaparin                                                                                      | QT-prolongation                |
| 28 | 57  | M      | DRV/RTV  | I                  | Gastric cancer, hypertension                     | Hydroxychloroquine, pantoprazole, caspofungin, tamsulosine, oxycodone/naloxone                                                    | Diarrhea                       |
| 29 | 63  | M      | DRV/RTV  | IIb                | None                                             | Hydroxychloroquine, azithromycin, enoxaparin, pantoprazole, methylprednisolone                                                    | None                           |
| 30 | 54  | F      | DRV/RTV  | IIa                | None                                             | Hydroxychloroquine, pantoprazole, ceftriaxone                                                                                     | None                           |

ADRs, adverse drug reactions; DRV/COBI, Darunavir/cobicistat; DRV/RTV, Darunavir/ritonavir; \*classified according to Siddiqi and Merha (4)

**Table S2.** Clinical data of the HIV infected patients (n=25)

| ID | Age | Gender | Drug             | Co-morbidities                                    | Co-treatments                                                                                       | ADRs     |
|----|-----|--------|------------------|---------------------------------------------------|-----------------------------------------------------------------------------------------------------|----------|
| 1  | 51  | M      | DRV/COBI/FTC/TAF | GERD                                              | Pantoprazole, colecalciferol                                                                        | None     |
| 2  | 52  | F      | DRV/COBI/FTC/TAF | None                                              | None                                                                                                | None     |
| 3  | 47  | M      | DRV/COBI/FTC/TAF | Depression                                        | Sertraline, alprazolam                                                                              | None     |
| 4  | 39  | M      | DRV/COBI/FTC/TAF | None                                              | None                                                                                                | Diarrhea |
| 5  | 47  | M      | DRV/COBI/FTC/TAF | Depression, Kaposi sarcoma, hyperuricemia         | Aspirin, allopurinol, venlafaxine, quetiapine, delorazepam, atovaquone                              | None     |
| 6  | 57  | M      | DRV/COBI/FTC/TAF | None                                              | None                                                                                                | None     |
| 7  | 73  | F      | DRV/COBI/FTC/TAF | Hypertension, atrial fibrillation, osteoporosis   | Betaxolol, flecainide, ramipril, colecalciferol, zolendronic acid                                   | None     |
| 8  | 42  | F      | DRV/COBI/FTC/TAF | Osteopenia                                        | Colecalciferol                                                                                      | None     |
| 9  | 35  | M      | DRV/COBI/FTC/TAF | GERD                                              | Lansoprazole, colecalciferol                                                                        | None     |
| 10 | 32  | M      | DRV/COBI/FTC/TAF | None                                              | Colecalciferol                                                                                      | None     |
| 11 | 27  | M      | DRV/COBI/FTC/TAF | None                                              | None                                                                                                | None     |
| 12 | 54  | F      | DRV/COBI/FTC/TAF | Gastric ulcer, ischemic stroke, hypertension      | Pantoprazole, colecalciferol, clopidogrel, olmesartan                                               | None     |
| 13 | 50  | M      | DRV/COBI/FTC/TAF | Hypertension, diabetes mellitus                   | Perindopril/indapamine/amlodipine, metformin, atorvastatin, aspirin, insulin lantus, colecalciferol | None     |
| 14 | 51  | M      | DRV/COBI/FTC/TAF | None                                              | None                                                                                                | None     |
| 15 | 59  | M      | DRV/COBI/FTC/TAF | Myocardial infarction, osteopenia                 | Colecalciferol, aspirin, prasugrel, atorvastatin, lansoprazole, bisoprolol                          | None     |
| 16 | 48  | M      | DRV/COBI/FTC/TAF | Hypertension, diabetes mellitus, neuropathic pain | Ramipril, lysine acetylsalicylate, atorvastatin, pregabalin, colecalciferol, metformin              | None     |
| 17 | 47  | F      | DRV/COBI/FTC/TAF | Barrett esophagus, psychosis                      | Risperidone, lorazepam, colecalciferol, pantoprazole                                                | None     |
| 18 | 47  | M      | DRV/COBI/FTC/TAF | Hypothyroidism, osteopenia                        | Levothyroxine, colecalciferol                                                                       | None     |
| 19 | 40  | M      | DRV/COBI/FTC/TAF | None                                              | Colecalciferol                                                                                      | None     |
| 20 | 33  | M      | DRV/COBI/FTC/TAF | None                                              | Colecalciferol, trimethoprim-sulfamethoxazole                                                       | None     |
| 21 | 49  | F      | DRV/COBI/FTC/TAF | Psychosis                                         | Olanzapine, delorazepam, colecalciferol                                                             | None     |
| 22 | 43  | F      | DRV/COBI/FTC/TAF | None                                              | Drospirenone-ethynil estradiol                                                                      | None     |
| 23 | 40  | M      | DRV/COBI/FTC/TAF | Kaposi sarcoma, depression, PJP                   | Sertraline, colecalciferol, pantoprazole, atovaquone, valganciclovir                                | None     |
| 24 | 47  | M      | DRV/COBI/FTC/TAF | Depression                                        | Sertraline, alprazolam                                                                              | None     |
| 25 | 31  | M      | DRV/COBI/FTC/TAF | None                                              | Colecalciferol                                                                                      | None     |

ADRs, adverse drug reactions; DRV/COBI/FTC/TAF, Darunavir/Cobicistat/Emtricitabine/Tenofovir; PJP *Pneumocystis jirovecii* pneumoniae; GERD, gastroesophageal reflux disease

## Supplementary Figure Captions

**Fig. S1.** Diagnostic plots for the population pharmacokinetic models. Observed versus individual predicted plasma concentrations in SARS-CoV2 patients and in HIV patients are shown. Solid lines refer to linear regression between observed and predicted concentrations. Dashed lines are the identity lines between observed and predicted concentrations.

**Fig. S2.** Classification and regression tree (CART) analysis of the partition of darunavir oral clearance (CL/F) depending on IL-6 concentrations in SARS-CoV2 patients (n = 30).

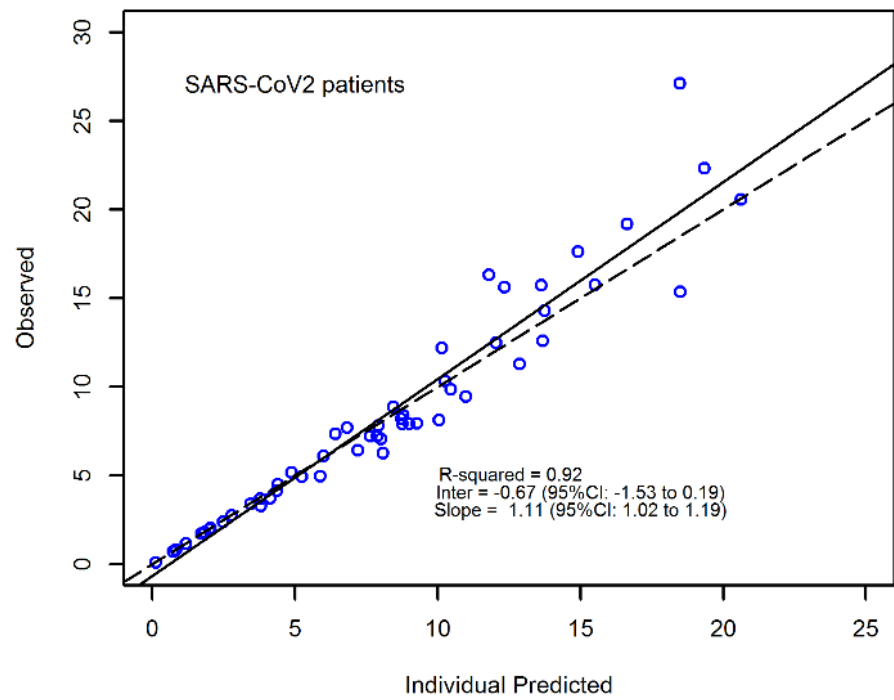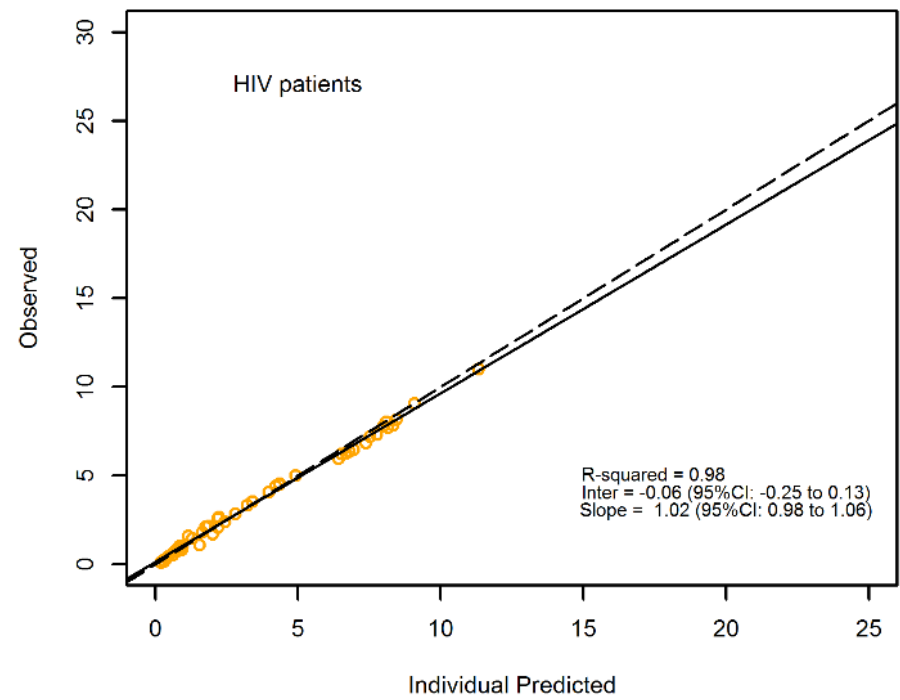

Fig.S1

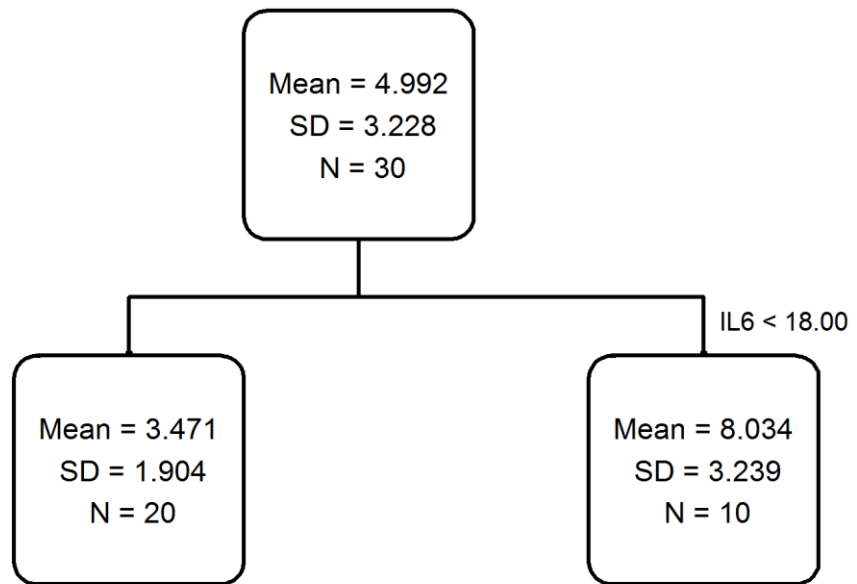

Fig. S2
